# Supplementary material for: 4-[4-(4-Methoxyphenyl)-1,3-butadienyl]-1-methylpyridinium 4-chlorobenzene sulphonate (MBMPCBS) – an efficient nonlinear optical crystal with superior thermal stability
Source: Royal Society of Chemistry journal article supplement (doi:10.1039/d3ce00090g), 2023-01-01
Supplement: d3ce00090g1.pdf [file d3ce00090g1.pdf]

4-[4-(4-methoxyphenyl)-1,3-butadienyl]-1methylpyridinium 4-chlorobenzene sulphonate  
(MBMPCBS) – An efficient nonlinear optical crystal with superior thermal stability

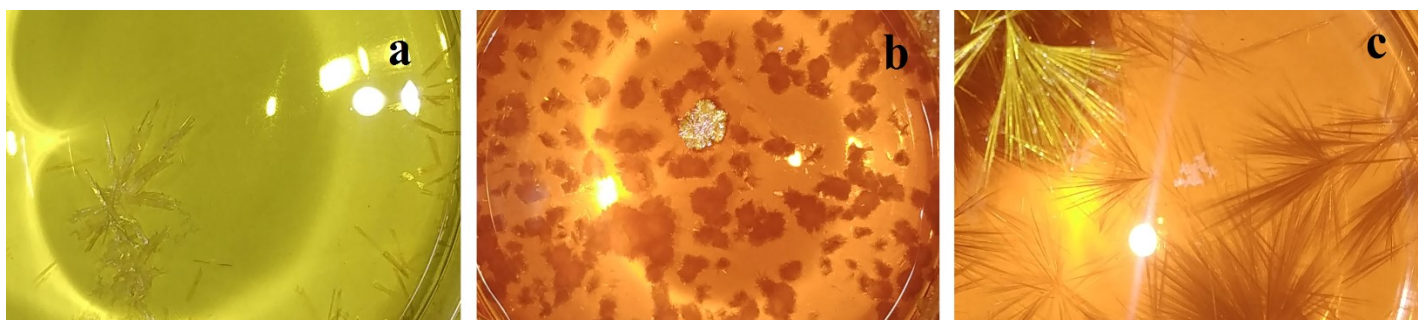

Fig. S1. MBMPCBS Crystals grown in (a) millipore water (b) methanol (c) methanol–acetonitrile solvent systems.

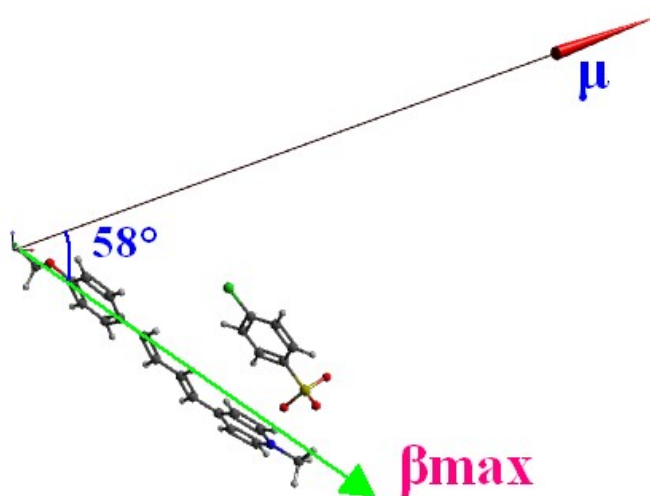

Fig. S2. Angle  $\theta$  ( $\mu$ ,  $\beta_{\max}$ ) between the direction of the dipole moment  $\mu$  and the main direction of the first hyperpolarizability  $\beta_{\max}$  of MBMPCBS.

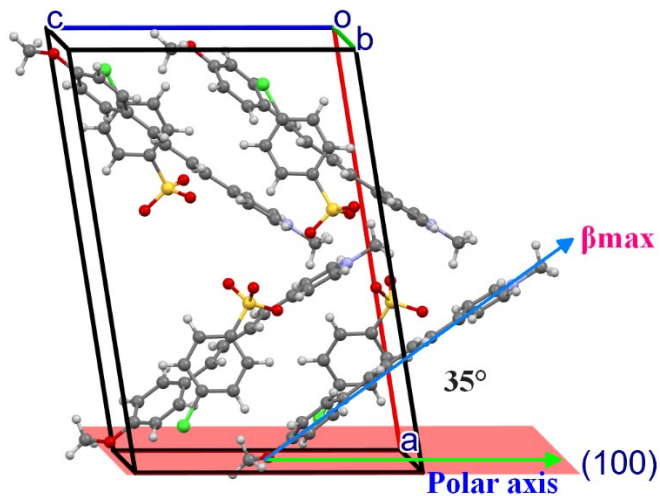

**Fig. S3.** Angle between the molecular hyperpolarizability  $\beta_{\max}$  and the polar *c*-axis for MBMPCBS.

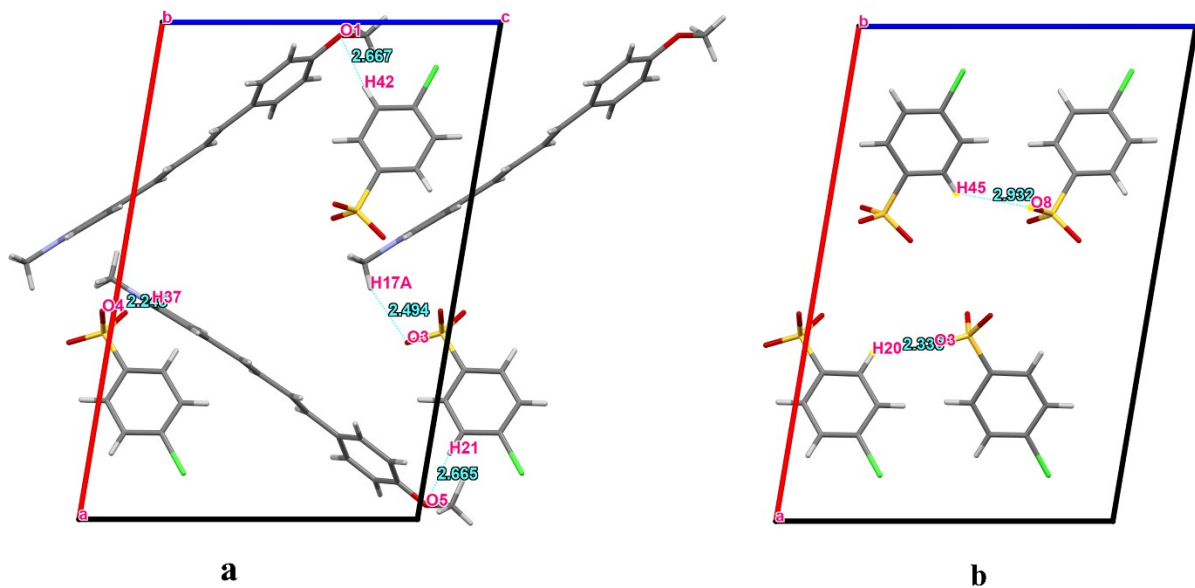

**Fig. S4.** Hydrogen bonding in MBMPCBS (a) between cations and anions and (b) between anions.

### <sup>1</sup>H NMR of MBMPCBS.

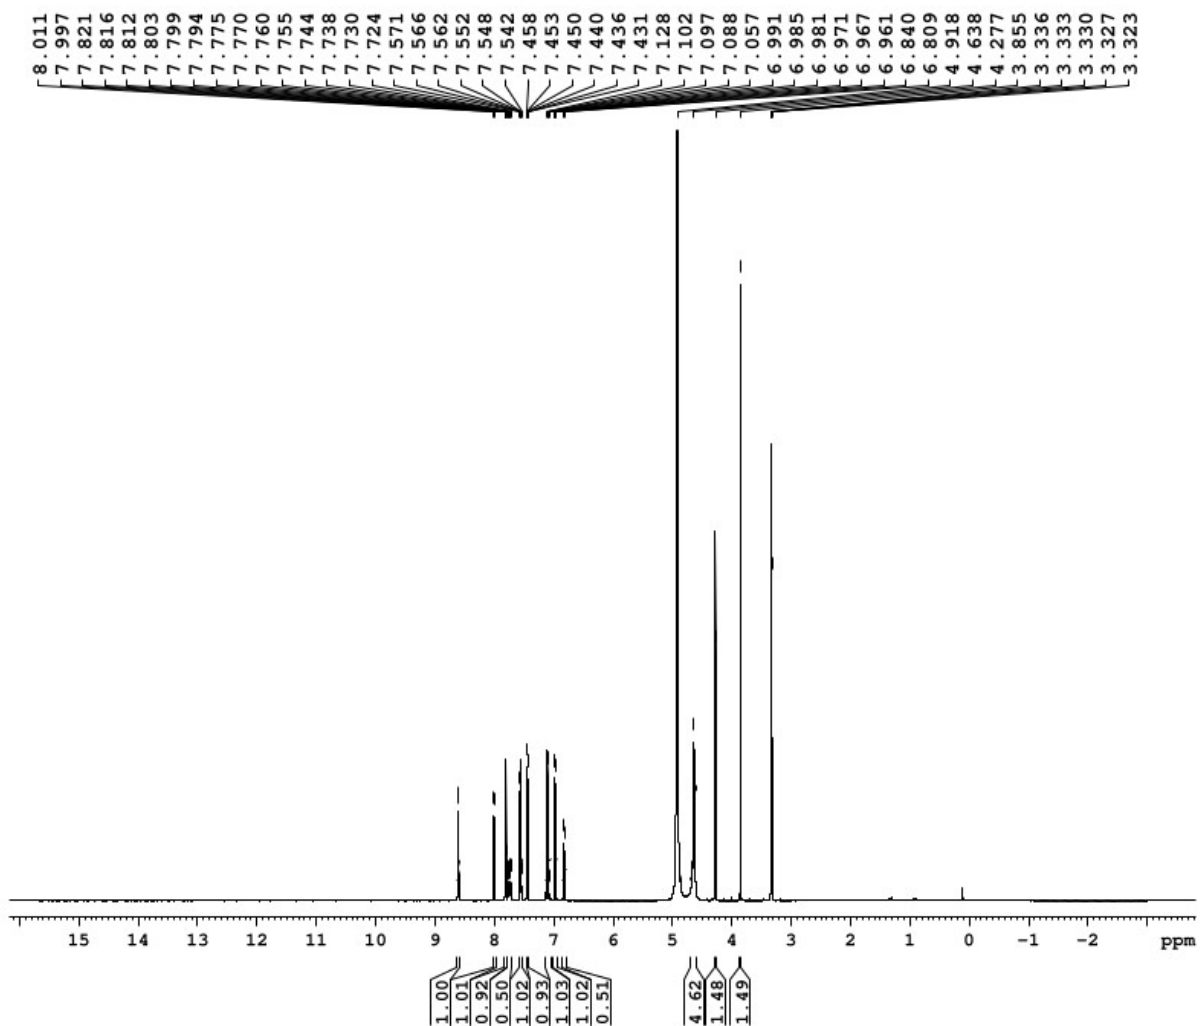

**Fig. S5.** <sup>1</sup>H NMR of MBMPCBS.

MBMPCBS, <sup>1</sup>H NMR (500 MHz, CD<sub>3</sub>OD, δ): 8.616 (2H, d, J=7.0Hz, C<sub>5</sub>H<sub>4</sub>N<sup>+</sup>), 8.011(2H,d, J=7.0 Hz, C<sub>5</sub>H<sub>4</sub>N<sup>+</sup>), 7.821 (2H, d, J = 13.5 Hz, C<sub>6</sub>H<sub>4</sub>Cl-SO<sub>3</sub><sup>-</sup>), 7.775 (2H, d, J = 22.5 Hz, C<sub>6</sub>H<sub>4</sub>Cl-SO<sub>3</sub>), 7.571 (2H, d, J = 14.5Hz, C<sub>6</sub>H<sub>4</sub>-OCH<sub>3</sub>), 7.458 (2H, d, J = 13.5 Hz C<sub>6</sub>H<sub>4</sub>-OCH<sub>3</sub>), 7.102 (1H, d, J = 7Hz, C<sub>6</sub>H<sub>4</sub>-OCH<sub>3</sub>=C<sub>5</sub>H<sub>4</sub> N<sup>+</sup>), 6.840 (1H, d, J = 15.5 Hz, C<sub>6</sub>H<sub>4</sub>-OCH<sub>3</sub>=C<sub>5</sub>H<sub>4</sub> N<sup>+</sup>), 4.277 (3H, s, C<sub>6</sub>H<sub>4</sub>-OCH<sub>3</sub>), 3.855 (3H,s, C<sub>5</sub>H<sub>4</sub>N<sup>+</sup>-CH<sub>3</sub>).

# <sup>1</sup>H NMR of MBMPI.

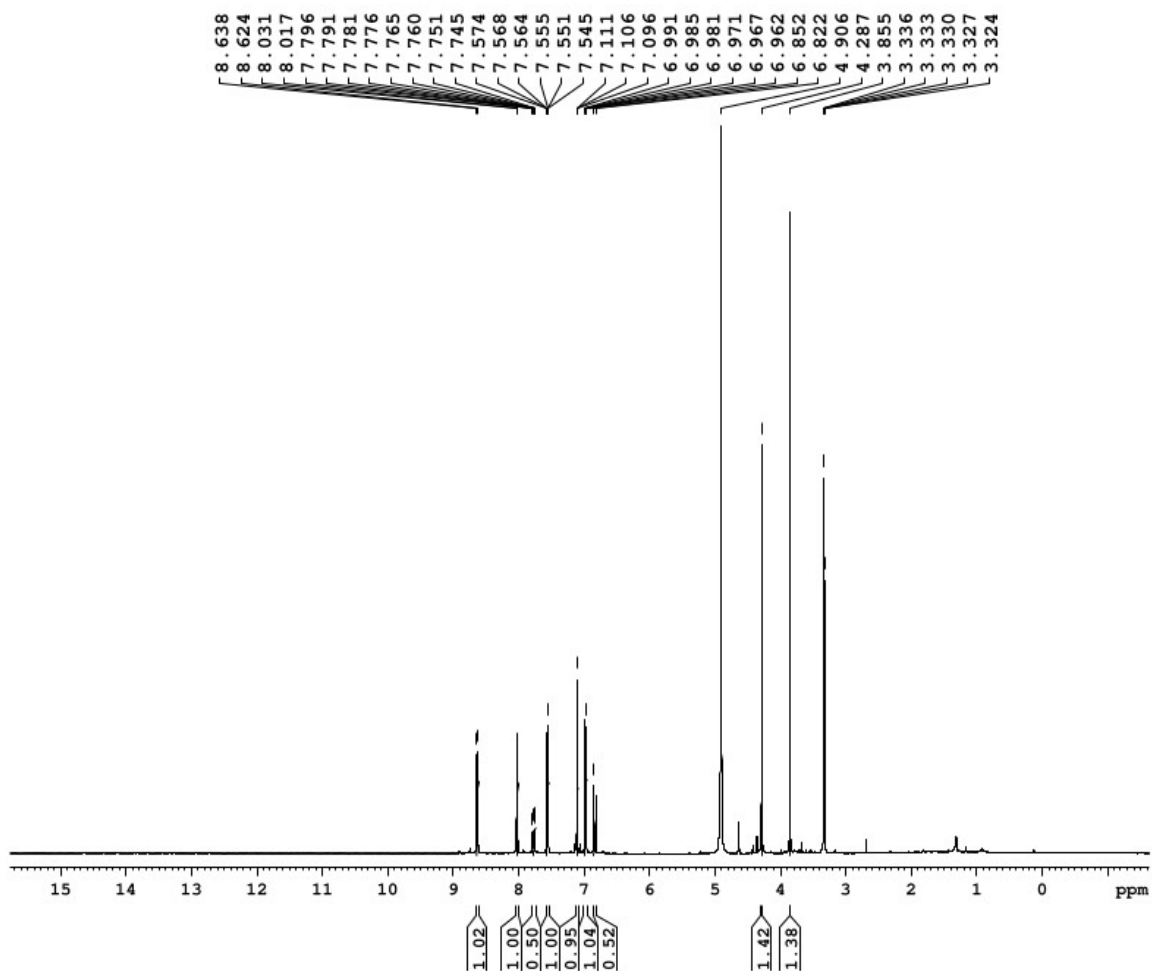

**Fig. S6.** <sup>1</sup>H NMR of MBMPI.

MBMPI, <sup>1</sup>H NMR (500 MHz, CD<sub>3</sub>OD, δ) 3.855 (3H, s), 4.287 (3H, s), 6.852 (1H, d, J = 15 Hz), 6.981, (2H, d, J = 5 Hz), 7.0–7.1 (2H, m), 7.551 (2H, d, J = 3 Hz), 7.776 (1H, dm, J = 5.5 Hz), 8.031 (2H, d, J = 7 Hz), and 8.638 (2H, d, J = 7 Hz).

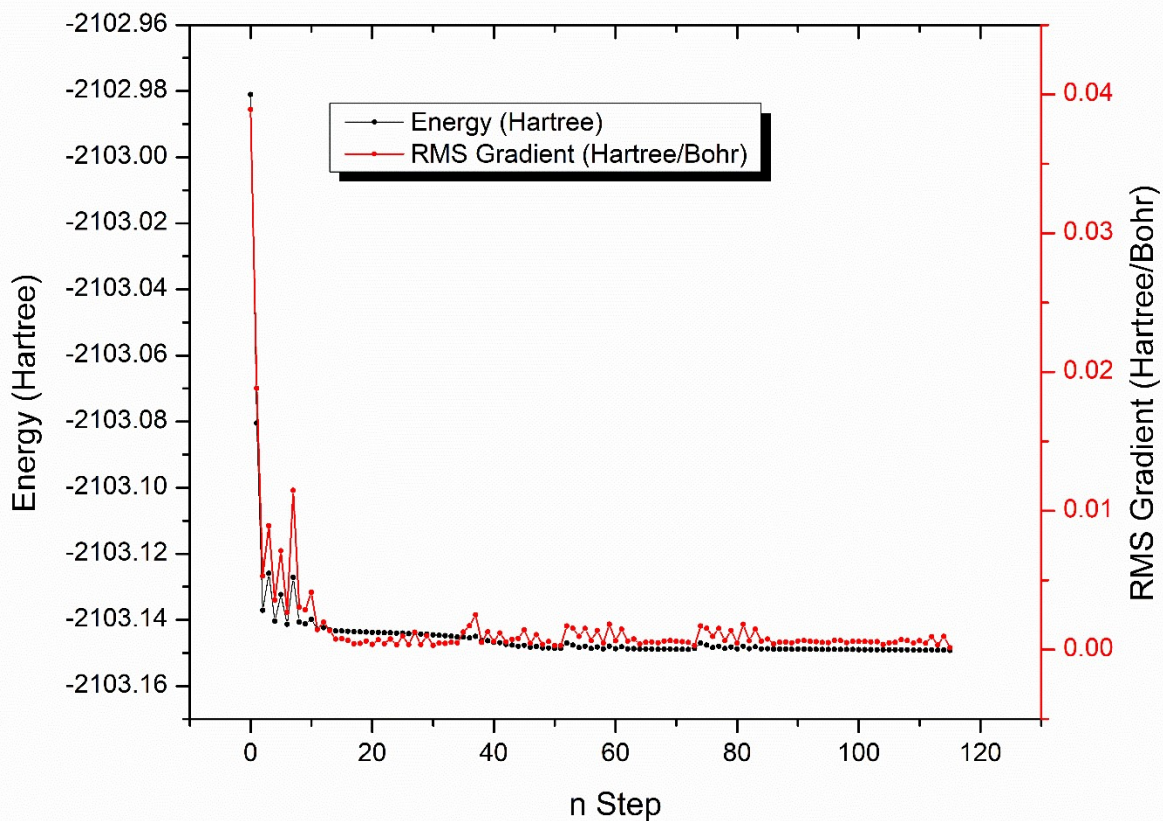

**Fig. S7.** Energy convergence plot depicting a global minimum.

**Table S1.** NLO results from DFT calculations.

| B3LYP/6-311+G<br>(d,p)           | Average polarizability |                | Polarizability anisotropy |                | 1st hyperpolarizability |                | 2nd hyperpolarizability |                |
|----------------------------------|------------------------|----------------|---------------------------|----------------|-------------------------|----------------|-------------------------|----------------|
|                                  | AU                     | $10^{-24}$ Esu | AU                        | $10^{-24}$ Esu | AU                      | $10^{-30}$ Esu | AU                      | $10^{-34}$ Esu |
| <b>Urea</b>                      | 28.28878               | 4.192          | 17.845397                 | 2.645          | 90.456874               | 0.7815         | 8017.4222               | 0.04038        |
| <b>MBSC</b>                      | 323.14854              | 47.89          | 221.95955                 | 32.89          | 8603.2476               | 74.32          | 294995.66               | 1.486          |
| <b>DAST</b>                      | 367.37173<br>26        | 54.4445        | 180.97944<br>24           | 26.8212        | 14128.033<br>62         | 122.052        | 374932.556              | 1.88842        |
| <b>MBMPCBS</b><br>(Present work) | 402.10166              | 59.59          | 234.68301                 | 34.78          | 16880.376               | 145.8          | 1015960.7               | 5.117          |

**Table S2.** Crystallography data of MBMPCBS

|                                   |                                                         |                                   |
|-----------------------------------|---------------------------------------------------------|-----------------------------------|
| Identification code               | Shelx                                                   |                                   |
| Empirical formula                 | C <sub>23</sub> H <sub>22</sub> Cl N O <sub>4</sub> S   |                                   |
| Formula weight                    | 443.92                                                  |                                   |
| Temperature                       | 200(2) K                                                |                                   |
| Wavelength                        | 0.71073 Å                                               |                                   |
| Crystal system                    | Monoclinic                                              |                                   |
| Space group                       | P c                                                     |                                   |
| Unit cell dimensions              | a = 18.8216(2) Å<br>b = 9.2134(2) Å<br>c = 12.6540(4) Å | α = 90°<br>β = 99.552°<br>γ = 90° |
| Volume                            | 2163.92(10) Å <sup>3</sup>                              |                                   |
| Z                                 | 4                                                       |                                   |
| Density (calculated)              | 1.363 Mg/m <sup>3</sup>                                 |                                   |
| Absorption coefficient            | 0.303 mm <sup>-1</sup>                                  |                                   |
| F(000)                            | 928                                                     |                                   |
| Crystal size                      | 0.300 x 0.250 x 0.250 mm <sup>3</sup>                   |                                   |
| Theta range for data collection   | 3.116 to 24.997°.                                       |                                   |
| Index ranges                      | -22 ≤ h ≤ 22, -10 ≤ k ≤ 10, -15 ≤ l ≤ 14                |                                   |
| Reflections collected             | 36832                                                   |                                   |
| Independent reflections           | 36832 [R(int) = ?]                                      |                                   |
| Completeness to theta = 24.997°   | 99.2 %                                                  |                                   |
| Absorption correction             | Semi-empirical from equivalents                         |                                   |
| Max. and min. transmission        | 0.7457 and 0.6354                                       |                                   |
| Refinement method                 | Full-matrix least-squares on F <sup>2</sup>             |                                   |
| Data / restraints / parameters    | 36832 / 176 / 602                                       |                                   |
| Goodness-of-fit on F <sup>2</sup> | 1.043                                                   |                                   |
| Final R indices [I > 2σ(I)]       | R1 = 0.0583, wR2 = 0.1462                               |                                   |
| R indices (all data)              | R1 = 0.0726, wR2 = 0.1582                               |                                   |
| Absolute structure parameter      | -0.07(3)                                                |                                   |
| Extinction coefficient            | n/a                                                     |                                   |
| Largest diff. peak and hole       | 0.404 and -0.388 e.Å <sup>-3</sup>                      |                                   |

**Table S3.** Atomic coordinates ( $\times 10^4$ ) and equivalent isotropic displacement parameters ( $\text{\AA}^2 \times 10^3$ ) for MBMPCBS.  $U(\text{eq})$  is defined as one third of the trace of the orthogonalized  $U_{ij}$  tensor.

|       | <i>X</i> | <i>Y</i> | <i>Z</i>  | <i>U(eq)</i> |
|-------|----------|----------|-----------|--------------|
| C(1)  | 734(5)   | 3484(10) | 4600(7)   | 42(2)        |
| C(2)  | 1156(6)  | 4685(10) | 4473(8)   | 42(2)        |
| C(3)  | 1616(6)  | 4665(11) | 3727(9)   | 46(2)        |
| C(4)  | 1665(4)  | 3461(9)  | 3078(6)   | 38(2)        |
| C(5)  | 1234(5)  | 2260(10) | 3220(7)   | 44(2)        |
| C(6)  | 780(5)   | 2283(10) | 3939(8)   | 52(2)        |
| C(7)  | 2134(5)  | 3398(10) | 2265(7)   | 45(2)        |
| C(8)  | 2477(5)  | 4495(11) | 1871(7)   | 45(2)        |
| C(9)  | 2911(5)  | 4295(12) | 1036(7)   | 48(2)        |
| C(10) | 3211(6)  | 5380(13) | 567(9)    | 50(3)        |
| C(11) | 3632(7)  | 5231(12) | -300(9)   | 48(3)        |
| C(12) | 3852(7)  | 6444(16) | -812(9)   | 58(3)        |
| C(13) | 4235(7)  | 6308(18) | -1618(9)  | 69(4)        |
| N(1)  | 4408(6)  | 5005(12) | -1979(9)  | 63(4)        |
| C(15) | 4217(6)  | 3773(15) | -1507(9)  | 59(3)        |
| C(16) | 3831(7)  | 3890(15) | -672(9)   | 55(3)        |
| C(17) | 262(7)   | 4545(13) | 6069(10)  | 65(3)        |
| C(18) | 7006(4)  | 5636(8)  | -4353(6)  | 31(2)        |
| C(19) | 7031(5)  | 5607(9)  | -3254(7)  | 40(2)        |
| C(20) | 7660(5)  | 5990(10) | -2558(8)  | 49(2)        |
| C(21) | 8262(5)  | 6351(10) | -2998(9)  | 50(2)        |
| C(22) | 8255(5)  | 6398(10) | -4090(9)  | 55(3)        |
| C(23) | 7619(5)  | 6048(10) | -4770(7)  | 43(2)        |
| C(14) | 4835(9)  | 4911(15) | -2854(12) | 81(5)        |
| O(1)  | 273(4)   | 3378(7)  | 5322(5)   | 58(2)        |
| Cl(1) | 9075(2)  | 6711(3)  | -2145(3)  | 81(1)        |
| S(1)  | 6194(1)  | 5192(2)  | -5236(2)  | 31(1)        |

|       |          |           |           |       |
|-------|----------|-----------|-----------|-------|
| O(2)  | 6343(12) | 3910(30)  | -5833(19) | 59(6) |
| O(3)  | 5653(10) | 4930(30)  | -4584(13) | 48(7) |
| O(4)  | 6015(12) | 6430(20)  | -5950(20) | 66(8) |
| O(2') | 6446(13) | 4690(40)  | -6158(19) | 59(8) |
| O(3') | 5857(15) | 4090(30)  | -4675(19) | 59(8) |
| O(4') | 5807(11) | 6530(20)  | -5320(30) | 53(8) |
| C(24) | 2372(5)  | 8956(10)  | 1418(7)   | 43(2) |
| C(25) | 1738(5)  | 8615(10)  | 1789(9)   | 52(2) |
| C(26) | 1720(5)  | 8655(10)  | 2860(9)   | 49(2) |
| C(27) | 2323(5)  | 9020(10)  | 3602(8)   | 50(2) |
| C(28) | 2962(5)  | 9399(10)  | 3232(7)   | 40(2) |
| C(29) | 2985(4)  | 9369(8)   | 2151(6)   | 31(2) |
| N(2)  | 5582(7)  | 9970(13)  | 5843(9)   | 73(4) |
| C(31) | 5777(7)  | 8781(17)  | 6412(10)  | 69(4) |
| C(32) | 6158(7)  | 8853(16)  | 7432(9)   | 62(4) |
| C(33) | 6366(7)  | 10196(12) | 7910(10)  | 53(3) |
| C(34) | 6147(8)  | 11413(17) | 7300(10)  | 65(4) |
| C(35) | 5764(7)  | 11273(19) | 6290(11)  | 75(5) |
| C(36) | 6784(6)  | 10340(13) | 8976(9)   | 50(3) |
| C(37) | 7081(5)  | 9285(11)  | 9609(7)   | 46(2) |
| C(38) | 7520(5)  | 9470(11)  | 10641(8)  | 46(2) |
| C(39) | 7859(5)  | 8380(10)  | 11214(7)  | 46(2) |
| C(40) | 8331(5)  | 8446(9)   | 12258(7)  | 38(2) |
| C(41) | 8384(6)  | 9667(10)  | 12917(8)  | 43(2) |
| C(42) | 8838(6)  | 9705(10)  | 13901(8)  | 44(2) |
| C(43) | 9258(5)  | 8489(10)  | 14232(7)  | 42(2) |
| C(44) | 9223(5)  | 7285(11)  | 13564(8)  | 52(2) |
| C(45) | 8767(5)  | 7262(10)  | 12612(7)  | 41(2) |
| C(46) | 9733(8)  | 9577(13)  | 15935(10) | 66(3) |
| C(30) | 5161(9)  | 9885(16)  | 4752(12)  | 92(6) |
| O(5)  | 9724(4)  | 8384(8)   | 15187(5)  | 57(2) |
| Cl(2) | 915(2)   | 8290(3)   | 3320(3)   | 81(1) |
| S(2)  | 3797(1)  | 9814(2)   | 1667(2)   | 31(1) |
| O(6)  | 3970(13) | 8580(20)  | 1050(30)  | 67(8) |
| O(7)  | 3646(13) | 11080(30) | 980(30)   | 67(7) |
| O(8)  | 4322(11) | 10090(40) | 2597(14)  | 62(8) |



|       |          |           |          |        |
|-------|----------|-----------|----------|--------|
| O(6') | 4168(16) | 8440(30)  | 1700(40) | 50(10) |
| O(7') | 3550(20) | 10330(80) | 610(30)  | 71(13) |
| O(8') | 4160(20) | 10850(50) | 2400(40) | 65(11) |

---

**Table S4.** Bond lengths [ $\text{\AA}$ ] and angles [ $^\circ$ ] for MBMPCBS.

---

|             |           |
|-------------|-----------|
| C(1)-O(1)   | 1.364(10) |
| C(1)-C(2)   | 1.387(12) |
| C(1)-C(6)   | 1.399(12) |
| C(2)-C(3)   | 1.383(15) |
| C(2)-H(2)   | 0.9500    |
| C(3)-C(4)   | 1.393(13) |
| C(3)-H(3)   | 0.9500    |
| C(4)-C(5)   | 1.402(12) |
| C(4)-C(7)   | 1.464(12) |
| C(5)-C(6)   | 1.348(13) |
| C(5)-H(5)   | 0.9500    |
| C(6)-H(6)   | 0.9500    |
| C(7)-C(8)   | 1.339(13) |
| C(7)-H(7)   | 0.9500    |
| C(8)-C(9)   | 1.450(13) |
| C(8)-H(8)   | 0.9500    |
| C(9)-C(10)  | 1.335(14) |
| C(9)-H(9)   | 0.9500    |
| C(10)-C(11) | 1.464(16) |
| C(10)-H(10) | 0.9500    |
| C(11)-C(12) | 1.389(16) |
| C(11)-C(16) | 1.395(17) |
| C(12)-C(13) | 1.349(18) |
| C(12)-H(12) | 0.9500    |
| C(13)-N(1)  | 1.343(17) |
| C(13)-H(13) | 0.9500    |
| N(1)-C(15)  | 1.358(15) |
| N(1)-C(14)  | 1.476(19) |

|              |           |
|--------------|-----------|
| C(15)-C(16)  | 1.382(16) |
| C(15)-H(15)  | 0.9500    |
| C(16)-H(16)  | 0.9500    |
| C(17)-O(1)   | 1.434(12) |
| C(17)-H(17A) | 0.9800    |
| C(17)-H(17B) | 0.9800    |
| C(17)-H(17C) | 0.9800    |
| C(18)-C(19)  | 1.383(11) |
| C(18)-C(23)  | 1.398(11) |
| C(18)-S(1)   | 1.785(8)  |
| C(19)-C(20)  | 1.399(12) |
| C(19)-H(19)  | 0.9500    |
| C(20)-C(21)  | 1.385(13) |
| C(20)-H(20)  | 0.9500    |
| C(21)-C(22)  | 1.380(14) |
| C(21)-Cl(1)  | 1.750(9)  |
| C(22)-C(23)  | 1.392(13) |
| C(22)-H(22)  | 0.9500    |
| C(23)-H(23)  | 0.9500    |
| C(14)-H(1A)  | 0.9800    |
| C(14)-H(1B)  | 0.9800    |
| C(14)-H(1C)  | 0.9800    |
| S(1)-O(2')   | 1.408(18) |
| S(1)-O(4')   | 1.425(16) |
| S(1)-O(3)    | 1.433(15) |
| S(1)-O(3')   | 1.443(16) |
| S(1)-O(2)    | 1.453(16) |
| S(1)-O(4)    | 1.461(14) |
| C(24)-C(25)  | 1.389(12) |
| C(24)-C(29)  | 1.407(11) |
| C(24)-H(24)  | 0.9500    |
| C(25)-C(26)  | 1.362(14) |
| C(25)-H(25)  | 0.9500    |
| C(26)-C(27)  | 1.389(14) |
| C(26)-Cl(2)  | 1.743(9)  |
| C(27)-C(28)  | 1.405(12) |

|             |           |
|-------------|-----------|
| C(27)-H(27) | 0.9500    |
| C(28)-C(29) | 1.376(11) |
| C(28)-H(28) | 0.9500    |
| C(29)-S(2)  | 1.786(8)  |
| N(2)-C(31)  | 1.328(16) |
| N(2)-C(35)  | 1.346(19) |
| N(2)-C(30)  | 1.476(19) |
| C(31)-C(32) | 1.371(17) |
| C(31)-H(31) | 0.9500    |
| C(32)-C(33) | 1.404(18) |
| C(32)-H(32) | 0.9500    |
| C(33)-C(34) | 1.384(16) |
| C(33)-C(36) | 1.451(17) |
| C(34)-C(35) | 1.37(2)   |
| C(34)-H(34) | 0.9500    |
| C(35)-H(35) | 0.9500    |
| C(36)-C(37) | 1.323(14) |
| C(36)-H(36) | 0.9500    |
| C(37)-C(38) | 1.434(13) |
| C(37)-H(37) | 0.9500    |
| C(38)-C(39) | 1.337(13) |
| C(38)-H(38) | 0.9500    |
| C(39)-C(40) | 1.466(12) |
| C(39)-H(39) | 0.9500    |
| C(40)-C(45) | 1.393(12) |
| C(40)-C(41) | 1.394(12) |
| C(41)-C(42) | 1.389(15) |
| C(41)-H(41) | 0.9500    |
| C(42)-C(43) | 1.395(13) |
| C(42)-H(42) | 0.9500    |
| C(43)-O(5)  | 1.373(11) |
| C(43)-C(44) | 1.390(12) |
| C(44)-C(45) | 1.359(13) |
| C(44)-H(44) | 0.9500    |
| C(45)-H(45) | 0.9500    |
| C(46)-O(5)  | 1.449(12) |

|              |           |
|--------------|-----------|
| C(46)-H(46A) | 0.9800    |
| C(46)-H(46B) | 0.9800    |
| C(46)-H(46C) | 0.9800    |
| C(30)-H(2A)  | 0.9800    |
| C(30)-H(2B)  | 0.9800    |
| C(30)-H(2C)  | 0.9800    |
| S(2)-O(8')   | 1.42(3)   |
| S(2)-O(7')   | 1.42(3)   |
| S(2)-O(8)    | 1.429(17) |
| S(2)-O(6')   | 1.44(2)   |
| S(2)-O(6)    | 1.450(14) |
| S(2)-O(7)    | 1.452(16) |

|                |          |
|----------------|----------|
| O(1)-C(1)-C(2) | 125.2(8) |
| O(1)-C(1)-C(6) | 117.0(8) |
| C(2)-C(1)-C(6) | 117.9(9) |
| C(3)-C(2)-C(1) | 120.3(9) |
| C(3)-C(2)-H(2) | 119.8    |
| C(1)-C(2)-H(2) | 119.8    |
| C(2)-C(3)-C(4) | 121.5(9) |
| C(2)-C(3)-H(3) | 119.2    |
| C(4)-C(3)-H(3) | 119.2    |
| C(3)-C(4)-C(5) | 117.2(8) |
| C(3)-C(4)-C(7) | 123.6(8) |
| C(5)-C(4)-C(7) | 119.2(8) |
| C(6)-C(5)-C(4) | 121.3(9) |
| C(6)-C(5)-H(5) | 119.3    |
| C(4)-C(5)-H(5) | 119.3    |
| C(5)-C(6)-C(1) | 121.7(9) |
| C(5)-C(6)-H(6) | 119.2    |
| C(1)-C(6)-H(6) | 119.2    |
| C(8)-C(7)-C(4) | 128.0(9) |
| C(8)-C(7)-H(7) | 116.0    |
| C(4)-C(7)-H(7) | 116.0    |
| C(7)-C(8)-C(9) | 122.7(9) |
| C(7)-C(8)-H(8) | 118.7    |

|                     |           |
|---------------------|-----------|
| C(9)-C(8)-H(8)      | 118.7     |
| C(10)-C(9)-C(8)     | 124.0(11) |
| C(10)-C(9)-H(9)     | 118.0     |
| C(8)-C(9)-H(9)      | 118.0     |
| C(9)-C(10)-C(11)    | 125.8(11) |
| C(9)-C(10)-H(10)    | 117.1     |
| C(11)-C(10)-H(10)   | 117.1     |
| C(12)-C(11)-C(16)   | 116.0(13) |
| C(12)-C(11)-C(10)   | 121.0(11) |
| C(16)-C(11)-C(10)   | 123.1(10) |
| C(13)-C(12)-C(11)   | 121.1(14) |
| C(13)-C(12)-H(12)   | 119.5     |
| C(11)-C(12)-H(12)   | 119.5     |
| N(1)-C(13)-C(12)    | 122.0(13) |
| N(1)-C(13)-H(13)    | 119.0     |
| C(12)-C(13)-H(13)   | 119.0     |
| C(13)-N(1)-C(15)    | 120.1(12) |
| C(13)-N(1)-C(14)    | 120.0(10) |
| C(15)-N(1)-C(14)    | 119.8(11) |
| N(1)-C(15)-C(16)    | 118.8(13) |
| N(1)-C(15)-H(15)    | 120.6     |
| C(16)-C(15)-H(15)   | 120.6     |
| C(15)-C(16)-C(11)   | 122.1(12) |
| C(15)-C(16)-H(16)   | 119.0     |
| C(11)-C(16)-H(16)   | 119.0     |
| O(1)-C(17)-H(17A)   | 109.5     |
| O(1)-C(17)-H(17B)   | 109.5     |
| H(17A)-C(17)-H(17B) | 109.5     |
| O(1)-C(17)-H(17C)   | 109.5     |
| H(17A)-C(17)-H(17C) | 109.5     |
| H(17B)-C(17)-H(17C) | 109.5     |
| C(19)-C(18)-C(23)   | 119.6(8)  |
| C(19)-C(18)-S(1)    | 120.5(6)  |
| C(23)-C(18)-S(1)    | 120.0(6)  |
| C(18)-C(19)-C(20)   | 120.8(9)  |
| C(18)-C(19)-H(19)   | 119.6     |

|                   |           |
|-------------------|-----------|
| C(20)-C(19)-H(19) | 119.6     |
| C(21)-C(20)-C(19) | 118.1(9)  |
| C(21)-C(20)-H(20) | 120.9     |
| C(19)-C(20)-H(20) | 120.9     |
| C(22)-C(21)-C(20) | 122.5(9)  |
| C(22)-C(21)-Cl(1) | 118.3(8)  |
| C(20)-C(21)-Cl(1) | 119.2(8)  |
| C(21)-C(22)-C(23) | 118.4(9)  |
| C(21)-C(22)-H(22) | 120.8     |
| C(23)-C(22)-H(22) | 120.8     |
| C(22)-C(23)-C(18) | 120.6(9)  |
| C(22)-C(23)-H(23) | 119.7     |
| C(18)-C(23)-H(23) | 119.7     |
| N(1)-C(14)-H(1A)  | 109.5     |
| N(1)-C(14)-H(1B)  | 109.5     |
| H(1A)-C(14)-H(1B) | 109.5     |
| N(1)-C(14)-H(1C)  | 109.5     |
| H(1A)-C(14)-H(1C) | 109.5     |
| H(1B)-C(14)-H(1C) | 109.5     |
| C(1)-O(1)-C(17)   | 117.9(8)  |
| O(2')-S(1)-O(4')  | 117.3(13) |
| O(2')-S(1)-O(3')  | 114.4(15) |
| O(4')-S(1)-O(3')  | 112.5(13) |
| O(3)-S(1)-O(2)    | 112.3(10) |
| O(3)-S(1)-O(4)    | 112.1(11) |
| O(2)-S(1)-O(4)    | 110.7(13) |
| O(2')-S(1)-C(18)  | 102.9(10) |
| O(4')-S(1)-C(18)  | 102.9(7)  |
| O(3)-S(1)-C(18)   | 107.1(7)  |
| O(3')-S(1)-C(18)  | 104.7(8)  |
| O(2)-S(1)-C(18)   | 107.1(8)  |
| O(4)-S(1)-C(18)   | 107.2(7)  |
| C(25)-C(24)-C(29) | 119.6(8)  |
| C(25)-C(24)-H(24) | 120.2     |
| C(29)-C(24)-H(24) | 120.2     |
| C(26)-C(25)-C(24) | 119.7(9)  |

|                   |           |
|-------------------|-----------|
| C(26)-C(25)-H(25) | 120.2     |
| C(24)-C(25)-H(25) | 120.2     |
| C(25)-C(26)-C(27) | 121.8(9)  |
| C(25)-C(26)-Cl(2) | 119.6(8)  |
| C(27)-C(26)-Cl(2) | 118.6(8)  |
| C(26)-C(27)-C(28) | 118.9(9)  |
| C(26)-C(27)-H(27) | 120.5     |
| C(28)-C(27)-H(27) | 120.5     |
| C(29)-C(28)-C(27) | 119.7(8)  |
| C(29)-C(28)-H(28) | 120.1     |
| C(27)-C(28)-H(28) | 120.1     |
| C(28)-C(29)-C(24) | 120.2(8)  |
| C(28)-C(29)-S(2)  | 120.4(6)  |
| C(24)-C(29)-S(2)  | 119.4(6)  |
| C(31)-N(2)-C(35)  | 118.7(13) |
| C(31)-N(2)-C(30)  | 121.3(13) |
| C(35)-N(2)-C(30)  | 120.0(11) |
| N(2)-C(31)-C(32)  | 121.6(14) |
| N(2)-C(31)-H(31)  | 119.2     |
| C(32)-C(31)-H(31) | 119.2     |
| C(31)-C(32)-C(33) | 120.8(13) |
| C(31)-C(32)-H(32) | 119.6     |
| C(33)-C(32)-H(32) | 119.6     |
| C(34)-C(33)-C(32) | 116.0(14) |
| C(34)-C(33)-C(36) | 120.7(12) |
| C(32)-C(33)-C(36) | 123.3(11) |
| C(35)-C(34)-C(33) | 120.5(15) |
| C(35)-C(34)-H(34) | 119.7     |
| C(33)-C(34)-H(34) | 119.7     |
| N(2)-C(35)-C(34)  | 122.3(13) |
| N(2)-C(35)-H(35)  | 118.8     |
| C(34)-C(35)-H(35) | 118.8     |
| C(37)-C(36)-C(33) | 127.3(12) |
| C(37)-C(36)-H(36) | 116.3     |
| C(33)-C(36)-H(36) | 116.3     |
| C(36)-C(37)-C(38) | 125.9(11) |

|                     |           |
|---------------------|-----------|
| C(36)-C(37)-H(37)   | 117.1     |
| C(38)-C(37)-H(37)   | 117.1     |
| C(39)-C(38)-C(37)   | 123.8(10) |
| C(39)-C(38)-H(38)   | 118.1     |
| C(37)-C(38)-H(38)   | 118.1     |
| C(38)-C(39)-C(40)   | 128.4(9)  |
| C(38)-C(39)-H(39)   | 115.8     |
| C(40)-C(39)-H(39)   | 115.8     |
| C(45)-C(40)-C(41)   | 117.3(8)  |
| C(45)-C(40)-C(39)   | 119.6(8)  |
| C(41)-C(40)-C(39)   | 123.0(8)  |
| C(42)-C(41)-C(40)   | 122.0(9)  |
| C(42)-C(41)-H(41)   | 119.0     |
| C(40)-C(41)-H(41)   | 119.0     |
| C(41)-C(42)-C(43)   | 118.9(9)  |
| C(41)-C(42)-H(42)   | 120.6     |
| C(43)-C(42)-H(42)   | 120.6     |
| O(5)-C(43)-C(44)    | 116.0(8)  |
| O(5)-C(43)-C(42)    | 124.6(8)  |
| C(44)-C(43)-C(42)   | 119.4(9)  |
| C(45)-C(44)-C(43)   | 120.7(9)  |
| C(45)-C(44)-H(44)   | 119.6     |
| C(43)-C(44)-H(44)   | 119.6     |
| C(44)-C(45)-C(40)   | 121.7(9)  |
| C(44)-C(45)-H(45)   | 119.2     |
| C(40)-C(45)-H(45)   | 119.2     |
| O(5)-C(46)-H(46A)   | 109.5     |
| O(5)-C(46)-H(46B)   | 109.5     |
| H(46A)-C(46)-H(46B) | 109.5     |
| O(5)-C(46)-H(46C)   | 109.5     |
| H(46A)-C(46)-H(46C) | 109.5     |
| H(46B)-C(46)-H(46C) | 109.5     |
| N(2)-C(30)-H(2A)    | 109.5     |
| N(2)-C(30)-H(2B)    | 109.5     |
| H(2A)-C(30)-H(2B)   | 109.5     |
| N(2)-C(30)-H(2C)    | 109.5     |



|                   |           |
|-------------------|-----------|
| H(2A)-C(30)-H(2C) | 109.5     |
| H(2B)-C(30)-H(2C) | 109.5     |
| C(43)-O(5)-C(46)  | 117.2(8)  |
| O(8')-S(2)-O(7')  | 116(2)    |
| O(8')-S(2)-O(6')  | 113.1(17) |
| O(7')-S(2)-O(6')  | 113.9(18) |
| O(8)-S(2)-O(6)    | 113.5(11) |
| O(8)-S(2)-O(7)    | 113.0(11) |
| O(6)-S(2)-O(7)    | 110.2(12) |
| O(8')-S(2)-C(29)  | 106.1(15) |
| O(7')-S(2)-C(29)  | 103.1(15) |
| O(8)-S(2)-C(29)   | 105.8(8)  |
| O(6')-S(2)-C(29)  | 103.1(10) |
| O(6)-S(2)-C(29)   | 106.7(7)  |
| O(7)-S(2)-C(29)   | 107.2(9)  |

---

Symmetry transformations used to generate equivalent atoms:

**Table S5.** Anisotropic displacement parameters ( $\text{\AA}^2 \times 10^3$ ) for MBMPCBS. The anisotropic displacement factor exponent takes the form:  $-2p^2[h^2a^*2U^{11} + \dots + 2hkab^*U^{12}]$

|       | U11    | U22     | U33    | U23     | U13     | U12    |
|-------|--------|---------|--------|---------|---------|--------|
| C(1)  | 33(5)  | 49(5)   | 41(5)  | 1(4)    | 0(4)    | 1(4)   |
| C(2)  | 48(6)  | 39(5)   | 35(5)  | -3(4)   | -2(5)   | -2(5)  |
| C(3)  | 48(6)  | 42(5)   | 46(6)  | 4(5)    | 1(5)    | -7(5)  |
| C(4)  | 38(5)  | 43(5)   | 30(4)  | 5(4)    | 0(4)    | 10(4)  |
| C(5)  | 53(6)  | 26(5)   | 53(6)  | 3(4)    | 10(5)   | -4(4)  |
| C(6)  | 56(6)  | 41(6)   | 57(6)  | 1(5)    | 6(5)    | -13(5) |
| C(7)  | 48(5)  | 40(5)   | 46(5)  | 1(4)    | 4(4)    | 6(4)   |
| C(8)  | 44(6)  | 51(6)   | 38(5)  | -1(5)   | 2(4)    | 1(5)   |
| C(9)  | 44(5)  | 56(6)   | 42(6)  | -1(5)   | 3(4)    | -3(5)  |
| C(10) | 45(6)  | 59(6)   | 46(6)  | -3(5)   | 3(5)    | -6(5)  |
| C(11) | 42(6)  | 65(7)   | 33(6)  | 1(5)    | -2(5)   | -13(5) |
| C(12) | 54(7)  | 69(8)   | 48(7)  | 12(5)   | 0(5)    | -15(6) |
| C(13) | 52(7)  | 106(12) | 43(7)  | 23(7)   | -5(5)   | -33(7) |
| N(1)  | 39(6)  | 111(11) | 36(6)  | 5(5)    | -1(5)   | -16(5) |
| C(15) | 45(6)  | 82(9)   | 48(7)  | -7(6)   | 2(5)    | -17(6) |
| C(16) | 43(6)  | 75(9)   | 46(6)  | 0(6)    | 6(5)    | -21(6) |
| C(17) | 64(8)  | 74(7)   | 61(7)  | -5(7)   | 25(6)   | 10(7)  |
| C(18) | 36(5)  | 23(4)   | 35(4)  | -4(3)   | 6(3)    | 2(3)   |
| C(19) | 43(5)  | 39(5)   | 37(5)  | 6(4)    | 5(4)    | 6(4)   |
| C(20) | 52(6)  | 39(5)   | 50(6)  | 1(4)    | -8(4)   | 8(4)   |
| C(21) | 39(5)  | 34(5)   | 72(7)  | -3(5)   | -9(5)   | 3(4)   |
| C(22) | 38(5)  | 44(6)   | 82(8)  | -9(5)   | 10(5)   | -8(4)  |
| C(23) | 47(5)  | 36(5)   | 50(6)  | -1(4)   | 16(4)   | 1(4)   |
| C(14) | 49(9)  | 157(17) | 37(7)  | 13(6)   | 5(7)    | -25(7) |
| O(1)  | 46(4)  | 76(5)   | 56(4)  | -1(3)   | 17(3)   | -3(3)  |
| Cl(1) | 56(2)  | 50(2)   | 121(3) | -16(2)  | -32(2)  | 1(1)   |
| S(1)  | 38(2)  | 25(1)   | 30(1)  | 2(1)    | 7(1)    | 1(1)   |
| O(2)  | 70(12) | 61(13)  | 45(10) | -21(9)  | 10(8)   | 13(10) |
| O(3)  | 34(9)  | 78(18)  | 35(8)  | -5(7)   | 12(7)   | -6(8)  |
| O(4)  | 63(12) | 41(9)   | 83(16) | 35(10)  | -22(11) | -12(8) |
| O(2') | 51(12) | 100(20) | 30(12) | -26(12) | 11(9)   | 8(13)  |

|       |        |         |        |         |         |         |
|-------|--------|---------|--------|---------|---------|---------|
| O(3') | 55(13) | 52(16)  | 66(12) | 24(11)  | -1(10)  | -23(11) |
| O(4') | 45(10) | 31(9)   | 75(18) | -11(9)  | -12(10) | 9(7)    |
| C(24) | 45(5)  | 41(6)   | 44(5)  | 2(4)    | 5(4)    | -1(4)   |
| C(25) | 43(5)  | 41(6)   | 70(7)  | 2(5)    | -1(5)   | -4(4)   |
| C(26) | 41(5)  | 33(5)   | 78(7)  | 11(5)   | 22(5)   | 5(4)    |
| C(27) | 57(6)  | 40(5)   | 59(6)  | 3(4)    | 30(5)   | 5(5)    |
| C(28) | 40(5)  | 44(5)   | 36(5)  | -2(4)   | 11(4)   | 4(4)    |
| C(29) | 36(5)  | 26(4)   | 33(4)  | 1(3)    | 9(4)    | 2(3)    |
| N(2)  | 52(7)  | 139(14) | 32(6)  | 11(5)   | 18(5)   | 48(6)   |
| C(31) | 58(8)  | 103(11) | 48(7)  | -7(7)   | 12(6)   | 41(7)   |
| C(32) | 62(8)  | 91(10)  | 34(6)  | 8(6)    | 12(5)   | 38(7)   |
| C(33) | 44(7)  | 80(8)   | 40(7)  | 5(5)    | 19(5)   | 28(6)   |
| C(34) | 56(8)  | 85(9)   | 57(7)  | 24(6)   | 24(6)   | 26(7)   |
| C(35) | 58(8)  | 118(13) | 57(8)  | 41(8)   | 30(7)   | 52(8)   |
| C(36) | 50(6)  | 58(6)   | 42(6)  | 3(5)    | 11(5)   | 16(5)   |
| C(37) | 44(5)  | 54(6)   | 40(5)  | 0(4)    | 14(4)   | 8(5)    |
| C(38) | 45(6)  | 55(6)   | 40(5)  | 1(5)    | 10(4)   | 5(5)    |
| C(39) | 47(5)  | 47(6)   | 44(5)  | -2(4)   | 9(4)    | -4(4)   |
| C(40) | 37(5)  | 40(5)   | 38(5)  | 3(4)    | 10(4)   | -10(4)  |
| C(41) | 62(7)  | 26(4)   | 43(6)  | 4(4)    | 16(5)   | 8(5)    |
| C(42) | 62(7)  | 35(5)   | 35(5)  | 0(4)    | 11(5)   | -9(5)   |
| C(43) | 34(5)  | 53(6)   | 40(5)  | 2(4)    | 13(4)   | -8(4)   |
| C(44) | 55(6)  | 44(6)   | 58(6)  | 2(5)    | 8(5)    | 11(5)   |
| C(45) | 46(6)  | 31(5)   | 47(5)  | 2(4)    | 6(4)    | 4(4)    |
| C(46) | 78(9)  | 77(8)   | 40(6)  | -1(6)   | 0(6)    | -25(7)  |
| C(30) | 54(10) | 190(20) | 32(7)  | 13(7)   | 11(7)   | 47(8)   |
| O(5)  | 46(4)  | 77(5)   | 46(4)  | -2(3)   | -1(3)   | 3(3)    |
| Cl(2) | 60(2)  | 50(2)   | 146(3) | 15(2)   | 57(2)   | 3(1)    |
| S(2)  | 38(2)  | 27(1)   | 30(1)  | 0(1)    | 10(1)   | -2(1)   |
| O(6)  | 78(12) | 38(8)   | 99(19) | -28(10) | 50(13)  | -12(8)  |
| O(7)  | 65(11) | 67(13)  | 72(14) | 43(10)  | 25(10)  | 11(10)  |
| O(8)  | 43(10) | 110(20) | 31(8)  | -2(8)   | 1(7)    | -24(10) |
| O(6') | 45(14) | 36(12)  | 80(20) | 8(12)   | 39(15)  | 13(9)   |
| O(7') | 53(17) | 120(40) | 39(18) | 37(18)  | 13(14)  | 10(20)  |
| O(8') | 70(20) | 60(20)  | 70(20) | -18(16) | 19(16)  | -30(17) |

---

**Table S6.** Hydrogen coordinates ( $\times 10^4$ ) and isotropic displacement parameters ( $\text{\AA}^2 \times 10^3$ ) for MBMPCBS.

|        | <i>X</i> | <i>Y</i> | <i>Z</i> | U(eq) |
|--------|----------|----------|----------|-------|
| H(2)   | 1129     | 5525     | 4899     | 50    |
| H(3)   | 1905     | 5493     | 3656     | 55    |
| H(5)   | 1263     | 1412     | 2802     | 53    |
| H(6)   | 483      | 1462     | 3997     | 62    |
| H(7)   | 2205     | 2463     | 1983     | 54    |
| H(8)   | 2433     | 5443     | 2149     | 54    |
| H(9)   | 2986     | 3333     | 810      | 57    |
| H(10)  | 3144     | 6334     | 819      | 60    |
| H(12)  | 3732     | 7385     | -590     | 70    |
| H(13)  | 4386     | 7159     | -1941    | 82    |
| H(15)  | 4346     | 2848     | -1747    | 71    |
| H(16)  | 3697     | 3029     | -341     | 66    |
| H(17A) | 745      | 4679     | 6483     | 97    |
| H(17B) | -76      | 4314     | 6556     | 97    |
| H(17C) | 109      | 5440     | 5678     | 97    |
| H(19)  | 6615     | 5324     | -2970    | 48    |
| H(20)  | 7673     | 6002     | -1804    | 59    |
| H(22)  | 8675     | 6663     | -4371    | 65    |
| H(23)  | 7600     | 6088     | -5524    | 52    |
| H(1A)  | 4665     | 4090     | -3321    | 122   |
| H(1B)  | 5344     | 4770     | -2551    | 122   |
| H(1C)  | 4780     | 5811     | -3273    | 122   |
| H(24)  | 2391     | 8912     | 673      | 52    |
| H(25)  | 1319     | 8355     | 1299     | 63    |
| H(27)  | 2304     | 9013     | 4348     | 60    |
| H(28)  | 3376     | 9676     | 3726     | 48    |
| H(31)  | 5649     | 7858     | 6103     | 83    |
| H(32)  | 6283     | 7982     | 7821     | 74    |

|        |       |       |       |     |
|--------|-------|-------|-------|-----|
| H(34)  | 6264  | 12352 | 7586  | 77  |
| H(35)  | 5621  | 12125 | 5887  | 90  |
| H(36)  | 6851  | 11298 | 9251  | 59  |
| H(37)  | 6997  | 8319  | 9358  | 55  |
| H(38)  | 7572  | 10420 | 10934 | 56  |
| H(39)  | 7783  | 7442  | 10905 | 55  |
| H(41)  | 8101  | 10497 | 12686 | 52  |
| H(42)  | 8862  | 10545 | 14341 | 52  |
| H(44)  | 9522  | 6468  | 13775 | 63  |
| H(45)  | 8744  | 6418  | 12176 | 50  |
| H(46A) | 9870  | 10472 | 15603 | 99  |
| H(46B) | 10082 | 9371  | 16583 | 99  |
| H(46C) | 9252  | 9693  | 16125 | 99  |
| H(2A)  | 5256  | 10747 | 4344  | 138 |
| H(2B)  | 4646  | 9839  | 4795  | 138 |
| H(2C)  | 5300  | 9013  | 4393  | 138 |

---

**Table S7.** Crystal data and structure refinement for MBMPI.

|                                             |                                                               |
|---------------------------------------------|---------------------------------------------------------------|
| Identification code                         | MBMPI                                                         |
| Empirical formula                           | C <sub>17</sub> H <sub>18</sub> NOI                           |
| Formula weight                              | 379.22                                                        |
| Temperature/K                               | 173(2)                                                        |
| Crystal system                              | Monoclinic                                                    |
| Space group                                 | P2 <sub>1</sub> /n                                            |
| a/Å                                         | 6.3116(12)                                                    |
| b/Å                                         | 7.6593(13)                                                    |
| c/Å                                         | 33.650(6)                                                     |
| α/°                                         | 90                                                            |
| β/°                                         | 91.663(6)                                                     |
| γ/°                                         | 90                                                            |
| Volume/Å <sup>3</sup>                       | 1626.0(5)                                                     |
| Z                                           | 4                                                             |
| ρ <sub>calc</sub> /g/cm <sup>3</sup>        | 1.549                                                         |
| μ/mm <sup>-1</sup>                          | 1.965                                                         |
| F(000)                                      | 752.0                                                         |
| Crystal size/mm <sup>3</sup>                | 0.358 × 0.228 × 0.097                                         |
| Radiation                                   | MoKα (λ = 0.71073)                                            |
| 2θ range for data collection/°              | 4.844 to 54.982                                               |
| Index ranges                                | -8 ≤ h ≤ 8, -9 ≤ k ≤ 9, -43 ≤ l ≤ 43                          |
| Reflections collected                       | 25101                                                         |
| Independent reflections                     | 3685 [R <sub>int</sub> = 0.0508, R <sub>sigma</sub> = 0.0297] |
| Data/restraints/parameters                  | 3685/0/183                                                    |
| Goodness-of-fit on F <sup>2</sup>           | 1.176                                                         |
| Final R indexes [I ≥ 2σ (I)]                | R <sub>1</sub> = 0.0408, wR <sub>2</sub> = 0.1191             |
| Final R indexes [all data]                  | R <sub>1</sub> = 0.0417, wR <sub>2</sub> = 0.1203             |
| Largest diff. peak/hole / e Å <sup>-3</sup> | 0.48/-0.85                                                    |

**Table S8.** Fractional Atomic Coordinates (×10<sup>4</sup>) and Equivalent Isotropic Displacement Parameters (Å<sup>2</sup>×10<sup>3</sup>) for MBMPI. U<sub>eq</sub> is defined as 1/3 of the trace of the orthogonalised U<sub>ij</sub> tensor.

| Atom | X           | Y          | Z           | U(eq)      |
|------|-------------|------------|-------------|------------|
| C1   | 11952 (6)   | 8226 (4)   | 7986.3 (11) | 28.9 (7)   |
| C2   | 12635 (6)   | 9054 (5)   | 7640.3 (12) | 31.9 (7)   |
| C3   | 11293 (6)   | 9159 (5)   | 7313.6 (11) | 31.7 (7)   |
| C4   | 9254 (6)    | 8451 (4)   | 7310.9 (11) | 28.8 (7)   |
| C5   | 8571 (6)    | 7708 (5)   | 7666.1 (11) | 32.2 (7)   |
| C6   | 9897 (6)    | 7608 (5)   | 8000.8 (11) | 32.2 (7)   |
| C7   | 12757 (8)   | 7332 (6)   | 8651.6 (13) | 46.7 (10)  |
| C8   | 7954 (6)    | 8501 (5)   | 6944.4 (12) | 33.7 (8)   |
| C9   | 6107 (6)    | 7676 (5)   | 6872.8 (11) | 32.6 (7)   |
| C10  | 4925 (6)    | 7801 (5)   | 6502.0 (11) | 32.6 (7)   |
| C11  | 3023 (6)    | 7045 (5)   | 6442.4 (11) | 33.9 (8)   |
| C12  | -1417 (7)   | 6180 (5)   | 5718.4 (15) | 42.2 (10)  |
| C13  | -203 (7)    | 6187 (5)   | 6061.9 (14) | 38.5 (9)   |
| C14  | 1733 (6)    | 7090 (5)   | 6080.1 (11) | 31.7 (7)   |
| C15  | 2316 (6)    | 7976 (6)   | 5735.6 (12) | 36.7 (8)   |
| C16  | 1030 (7)    | 7924 (6)   | 5401.4 (12) | 41.0 (9)   |
| C17  | -2181 (9)   | 7023 (8)   | 5030.3 (16) | 58.9 (13)  |
| N1   | -797 (5)    | 7021 (5)   | 5395.3 (11) | 38.7 (7)   |
| O1   | 13423 (4)   | 8112 (4)   | 8289.9 (9)  | 36.5 (6)   |
| I1   | -3058.1 (4) | 1456.5 (4) | 5650.7 (2)  | 42.14 (13) |

**Table S9.** Anisotropic Displacement Parameters ( $\text{\AA}^2 \times 10^3$ ) for MBMPI. The Anisotropic displacement factor exponent takes the form:  $-2\pi^2[h^2a^{*2}U_{11}+2hka^*b^*U_{12}+\dots]$ .

| Atom | U <sub>11</sub> | U <sub>22</sub> | U <sub>33</sub> | U <sub>23</sub> | U <sub>13</sub> | U <sub>12</sub> |
|------|-----------------|-----------------|-----------------|-----------------|-----------------|-----------------|
| C1   | 33.9 (17)       | 21.3 (15)       | 31.5 (17)       | -3.7 (13)       | -0.6 (14)       | 1.8 (13)        |
| C2   | 31.5 (17)       | 26.8 (17)       | 37.7 (19)       | -4.3 (14)       | 3.9 (14)        | -3.5 (14)       |

**Table S9.** Anisotropic Displacement Parameters ( $\text{\AA}^2 \times 10^3$ ) for MBMPI. The Anisotropic displacement factor exponent takes the form:  $-2\pi^2[h^2a^{*2}U_{11}+2hka^*b^*U_{12}+\dots]$ .

| Atom | $U_{11}$   | $U_{22}$   | $U_{33}$   | $U_{23}$   | $U_{13}$   | $U_{12}$   |
|------|------------|------------|------------|------------|------------|------------|
| C3   | 37.6 (18)  | 27.5 (17)  | 30.1 (17)  | -0.5 (14)  | 4.6 (14)   | -2.9 (14)  |
| C4   | 30.1 (17)  | 24.0 (16)  | 32.3 (18)  | -1.3 (13)  | 0.0 (14)   | 2.7 (13)   |
| C5   | 27.6 (16)  | 33.4 (18)  | 35.7 (19)  | 3.8 (15)   | 1.9 (14)   | -3.4 (14)  |
| C6   | 35.3 (18)  | 31.5 (18)  | 29.9 (17)  | 3.9 (14)   | -0.1 (14)  | -3.6 (14)  |
| C7   | 56 (3)     | 44 (2)     | 39 (2)     | 6.4 (18)   | -15.7 (19) | -12 (2)    |
| C8   | 39 (2)     | 29.2 (18)  | 32.6 (18)  | 0.9 (14)   | 0.4 (15)   | 2.4 (14)   |
| C9   | 37.5 (18)  | 28.1 (17)  | 32.1 (18)  | 2.5 (14)   | 0.0 (14)   | 0.9 (14)   |
| C10  | 38.2 (19)  | 28.2 (17)  | 31.2 (18)  | 0.5 (14)   | 0.3 (14)   | 3.9 (14)   |
| C11  | 42 (2)     | 29.2 (17)  | 30.6 (18)  | 4.0 (14)   | -3.5 (15)  | -1.1 (15)  |
| C12  | 35 (2)     | 31.0 (19)  | 60 (3)     | 1.2 (18)   | -5.8 (18)  | -6.1 (16)  |
| C13  | 40 (2)     | 28.7 (18)  | 47 (2)     | 7.2 (16)   | -1.2 (17)  | -3.3 (15)  |
| C14  | 35.4 (18)  | 25.2 (16)  | 34.4 (18)  | -1.5 (14)  | -1.8 (14)  | 1.3 (14)   |
| C15  | 34.7 (18)  | 43 (2)     | 31.9 (18)  | 1.5 (16)   | -3.7 (15)  | -6.6 (16)  |
| C16  | 44 (2)     | 47 (2)     | 31.9 (19)  | 1.1 (17)   | -3.9 (16)  | -0.5 (18)  |
| C17  | 55 (3)     | 72 (3)     | 49 (3)     | -10 (2)    | -24 (2)    | -4 (3)     |
| N1   | 37.2 (17)  | 38.3 (18)  | 40.1 (18)  | -6.2 (14)  | -8.3 (14)  | 1.9 (14)   |
| O1   | 35.9 (14)  | 34.1 (14)  | 39.1 (15)  | 1.0 (11)   | -7.3 (11)  | -2.7 (11)  |
| I1   | 39.70 (18) | 45.08 (19) | 41.53 (18) | -2.91 (11) | -0.73 (11) | -9.11 (11) |

**Table S10.** Bond Lengths for MBMPI.

| Atom | Atom | Length/ $\text{\AA}$ | Atom | Atom | Length/ $\text{\AA}$ |
|------|------|----------------------|------|------|----------------------|
| C1   | C2   | 1.405 (5)            | C9   | C10  | 1.438 (5)            |



**Table S10.** Bond Lengths for MBMPI.

| Atom | Atom | Length/Å  | Atom | Atom | Length/Å  |
|------|------|-----------|------|------|-----------|
| C1   | C6   | 1.383 (5) | C10  | C11  | 1.343 (6) |
| C1   | O1   | 1.363 (5) | C11  | C14  | 1.446 (5) |
| C2   | C3   | 1.371 (6) | C12  | C13  | 1.369 (6) |
| C3   | C4   | 1.396 (5) | C12  | N1   | 1.332 (6) |
| C4   | C5   | 1.403 (5) | C13  | C14  | 1.403 (6) |
| C4   | C8   | 1.462 (5) | C14  | C15  | 1.402 (6) |
| C5   | C6   | 1.386 (5) | C15  | C16  | 1.368 (6) |
| C7   | O1   | 1.430 (5) | C16  | N1   | 1.344 (6) |
| C8   | C9   | 1.342 (6) | C17  | N1   | 1.487 (6) |

**Table S11.** Bond Angles for MBMPI.

| Atom | Atom | Atom | Angle/°   | Atom | Atom | Atom | Angle/°   |
|------|------|------|-----------|------|------|------|-----------|
| C6   | C1   | C2   | 119.6 (3) | C10  | C11  | C14  | 126.5 (4) |
| O1   | C1   | C2   | 115.5 (3) | N1   | C12  | C13  | 121.1 (4) |
| O1   | C1   | C6   | 124.8 (3) | C12  | C13  | C14  | 120.3 (4) |
| C3   | C2   | C1   | 119.6 (3) | C13  | C14  | C11  | 119.5 (4) |
| C2   | C3   | C4   | 122.0 (4) | C15  | C14  | C11  | 123.6 (4) |
| C3   | C4   | C5   | 117.3 (3) | C15  | C14  | C13  | 116.8 (4) |
| C3   | C4   | C8   | 119.3 (3) | C16  | C15  | C14  | 120.1 (4) |
| C5   | C4   | C8   | 123.4 (3) | N1   | C16  | C15  | 121.0 (4) |
| C6   | C5   | C4   | 121.4 (3) | C12  | N1   | C16  | 120.6 (4) |
| C1   | C6   | C5   | 119.8 (3) | C12  | N1   | C17  | 119.7 (4) |
| C9   | C8   | C4   | 127.1 (4) | C16  | N1   | C17  | 119.7 (4) |
| C8   | C9   | C10  | 123.4 (4) | C1   | O1   | C7   | 117.0 (3) |
| C11  | C10  | C9   | 122.7 (4) |      |      |      |           |

**Table S12.** Hydrogen Bonds for MBMPI.

| D   | H    | A               | d(D-H)/Å | d(H-A)/Å | d(D-A)/Å  | D-H-A/° |
|-----|------|-----------------|----------|----------|-----------|---------|
| C7  | H7A  | II <sup>1</sup> | 0.98     | 3.28     | 3.894 (5) | 122.6   |
| C7  | H7B  | II <sup>2</sup> | 0.98     | 3.12     | 4.087 (5) | 170.7   |
| C12 | H12  | II              | 0.95     | 3.16     | 3.768 (4) | 123.5   |
| C15 | H15  | II <sup>3</sup> | 0.95     | 3.05     | 3.970 (4) | 164.3   |
| C16 | H16  | II <sup>4</sup> | 0.95     | 2.97     | 3.829 (4) | 150.5   |
| C17 | H17C | II <sup>5</sup> | 0.98     | 3.30     | 3.904 (5) | 121.5   |

**Table S13.** Torsion Angles for MBMPI.

| A  | B   | C   | D   | Angle/°    | A   | B   | C   | D   | Angle/°    |
|----|-----|-----|-----|------------|-----|-----|-----|-----|------------|
| C1 | C2  | C3  | C4  | -0.6 (6)   | C10 | C11 | C14 | C13 | 178.2 (4)  |
| C2 | C1  | C6  | C5  | 4.2 (6)    | C10 | C11 | C14 | C15 | -0.8 (7)   |
| C2 | C1  | O1  | C7  | 177.8 (4)  | C11 | C14 | C15 | C16 | 178.5 (4)  |
| C2 | C3  | C4  | C5  | 3.7 (5)    | C12 | C13 | C14 | C11 | -178.4 (4) |
| C2 | C3  | C4  | C8  | -175.8 (3) | C12 | C13 | C14 | C15 | 0.7 (6)    |
| C3 | C4  | C5  | C6  | -2.8 (6)   | C13 | C12 | N1  | C16 | -1.0 (7)   |
| C3 | C4  | C8  | C9  | 169.9 (4)  | C13 | C12 | N1  | C17 | -178.5 (4) |
| C4 | C5  | C6  | C1  | -1.0 (6)   | C13 | C14 | C15 | C16 | -0.6 (6)   |
| C4 | C8  | C9  | C10 | 179.9 (4)  | C14 | C15 | C16 | N1  | -0.4 (7)   |
| C5 | C4  | C8  | C9  | -9.6 (6)   | C15 | C16 | N1  | C12 | 1.2 (7)    |
| C6 | C1  | C2  | C3  | -3.4 (5)   | C15 | C16 | N1  | C17 | 178.7 (5)  |
| C6 | C1  | O1  | C7  | -1.6 (5)   | N1  | C12 | C13 | C14 | 0.0 (7)    |
| C8 | C4  | C5  | C6  | 176.6 (4)  | O1  | C1  | C2  | C3  | 177.1 (3)  |
| C8 | C9  | C10 | C11 | -176.3 (4) | O1  | C1  | C6  | C5  | -176.4 (3) |
| C9 | C10 | C11 | C14 | -179.5 (4) |     |     |     |     |            |

**Table S14.** Hydrogen Atom Coordinates ( $\text{\AA} \times 10^4$ ) and Isotropic Displacement Parameters ( $\text{\AA}^2 \times 10^3$ ) for MBMPI.

| Atom | X        | Y       | Z       | U(eq) |
|------|----------|---------|---------|-------|
| H2   | 14018.99 | 9538.28 | 7632.81 | 38    |
| H3   | 11764.59 | 9731.39 | 7081.85 | 38    |
| H5   | 7168.74  | 7262.77 | 7677.31 | 39    |
| H6   | 9394.99  | 7117.39 | 8239.66 | 39    |
| H7A  | 11653.63 | 8055.68 | 8767.73 | 70    |
| H7B  | 13969.65 | 7243.34 | 8838.99 | 70    |
| H7C  | 12190.43 | 6163.48 | 8595.87 | 70    |
| H8   | 8474.65  | 9191.47 | 6733.98 | 40    |
| H9   | 5550.31  | 6973.97 | 7077.7  | 39    |
| H10  | 5514.02  | 8443.8  | 6290.56 | 39    |
| H11  | 2468.51  | 6418.69 | 6659.78 | 41    |
| H12  | -2724.7  | 5564.31 | 5710.12 | 51    |
| H13  | -671.73  | 5579.13 | 6289.17 | 46    |
| H15  | 3606.11  | 8614.1  | 5734.12 | 44    |
| H16  | 1435.14  | 8535.07 | 5169.94 | 49    |
| H17A | -2931.52 | 5905.26 | 5008.17 | 88    |
| H17B | -1310.88 | 7188.65 | 4796.72 | 88    |
| H17C | -3212.51 | 7974.84 | 5045.29 | 88    |

**Table S15.** The coordinates of the equilibrium structure

## EQUILIBRIUM GEOMETRY

COORDINATES OF ALL ATOMS ARE (ANGS)

| ATOM | CHARGE | X             | Y             | Z             |
|------|--------|---------------|---------------|---------------|
| C    | 6.0    | 11.2318359722 | -4.2676809228 | -8.2080909332 |
| C    | 6.0    | 10.0455479791 | -3.7956590977 | -7.6884936839 |
| C    | 6.0    | 9.4663452975  | -4.3858081050 | -6.5551471073 |
| C    | 6.0    | 10.1374627206 | -5.5168859048 | -6.0254090332 |
| C    | 6.0    | 11.2955448608 | -5.9666107108 | -6.5984518227 |
| N    | 7.0    | 11.8325279986 | -5.3576499343 | -7.6866427495 |
| C    | 6.0    | 13.0864368741 | -5.8577080156 | -8.2826081576 |
| C    | 6.0    | 8.2765012842  | -3.8052854916 | -5.9733450920 |
| C    | 6.0    | 7.7428630497  | -4.1118160572 | -4.7633788063 |
| C    | 6.0    | 6.6033111214  | -3.4536381246 | -4.1998845076 |
| C    | 6.0    | 6.1239430071  | -3.7264267281 | -2.9606874933 |
| C    | 6.0    | 5.0039166625  | -3.0933047077 | -2.2857830105 |
| C    | 6.0    | 4.6114838774  | -3.5571431959 | -1.0126096823 |
| C    | 6.0    | 3.5537593995  | -2.9891093294 | -0.3286952431 |
| C    | 6.0    | 2.8407827561  | -1.9224316310 | -0.8943086826 |
| C    | 6.0    | 3.2144749532  | -1.4381899042 | -2.1564716778 |
| C    | 6.0    | 4.2783409046  | -2.0206968803 | -2.8312159955 |
| O    | 8.0    | 1.8207973483  | -1.4323484154 | -0.1486456350 |
| C    | 6.0    | 1.0665947151  | -0.3318799855 | -0.6494059141 |
| C    | 6.0    | 12.6318960551 | -2.5952043449 | -4.7226263265 |
| C    | 6.0    | 12.9030600431 | -3.4485376906 | -3.6543216786 |
| C    | 6.0    | 12.1118013618 | -3.4142595578 | -2.5084490535 |
| C    | 6.0    | 11.0523450258 | -2.5138769090 | -2.4477576235 |
| C    | 6.0    | 10.7786089690 | -1.6434940481 | -3.4981201023 |
| C    | 6.0    | 11.5783927711 | -1.6873086534 | -4.6388178338 |
| S    | 16.0   | 13.6780499458 | -2.6616925419 | -6.2119973459 |
| O    | 8.0    | 14.7645107172 | -1.6995250117 | -5.9894990583 |
| O    | 8.0    | 12.7489274644 | -2.3010682118 | -7.3293547300 |
| O    | 8.0    | 14.0998335420 | -4.0915529320 | -6.2788352566 |
| CL   | 17.0   | 10.0294408167 | -2.4789174168 | -1.0057384845 |
| H    | 1.0    | 11.7330066823 | -3.7884254476 | -9.0331856219 |
| H    | 1.0    | 9.6142028954  | -2.9054278759 | -8.1253789837 |
| H    | 1.0    | 9.7608182463  | -6.0384883373 | -5.1566231260 |
| H    | 1.0    | 11.8469105869 | -6.8109997894 | -6.2097761151 |
| H    | 1.0    | 13.6793657005 | -5.0036988753 | -8.5980557797 |

|   |     |               |               |               |
|---|-----|---------------|---------------|---------------|
| H | 1.0 | 13.6550274676 | -6.3780169305 | -7.5176900759 |
| H | 1.0 | 12.8512852977 | -6.5194872069 | -9.1202828758 |
| H | 1.0 | 7.8166117990  | -3.0062226332 | -6.5491946900 |
| H | 1.0 | 8.2113196118  | -4.8762632172 | -4.1477684070 |
| H | 1.0 | 6.1295718000  | -2.6897561026 | -4.8108536546 |
| H | 1.0 | 6.6299175570  | -4.5013712336 | -2.3879554870 |
| H | 1.0 | 5.1527788198  | -4.3810998261 | -0.5592180730 |
| H | 1.0 | 3.2539752329  | -3.3500918509 | 0.6476962223  |
| H | 1.0 | 2.6879601445  | -0.6114832043 | -2.6142105308 |
| H | 1.0 | 4.5498717355  | -1.6222614250 | -3.8017728193 |
| H | 1.0 | 0.3262682478  | -0.1098772470 | 0.1169296702  |
| H | 1.0 | 1.7013011740  | 0.5464726036  | -0.8062646303 |
| H | 1.0 | 0.5558220849  | -0.5890640464 | -1.5836521796 |
| H | 1.0 | 13.7260553347 | -4.1480352707 | -3.7348449950 |
| H | 1.0 | 12.3172955263 | -4.0696677665 | -1.6709470735 |
| H | 1.0 | 9.9525803160  | -0.9470767788 | -3.4244279131 |
| H | 1.0 | 11.3770862454 | -1.0325870784 | -5.4780701405 |
